# Supplementary material for: Structure and reactivity of Trypanosoma brucei pteridine reductase: inhibition by the archetypal antifolate methotrexate
Source: PubMed Central journal article supplement (PMC1618733; doi:10.1111/j.1365-2958.2006.05332.x), 2006-08-10

### Supplemental Figure S1.

The difference density omit map (chicken wire) for dimethylarsinoyl-modified Cys59 (top) and Cys168 (bottom) of subunit A. The map was calculated with  $(F_o - F_c)$ ,  $\alpha_c$  coefficients and contoured at the  $3\sigma$  level; the As position gives a peak of height  $16\sigma$ , a water O typically 3 or  $4\sigma$ .  $F_o$  represents the observed structure factors,  $F_c$  the calculated structure factors and  $\alpha_c$  the calculated phases. The atomic coordinates of the dimethylarsinoyl group did not contribute to  $F_c$  or  $\alpha_c$ . Atomic positions are depicted in stick-mode colored As purple, C black, N blue, O red.

#### dimethylarsinoyl-Cys59

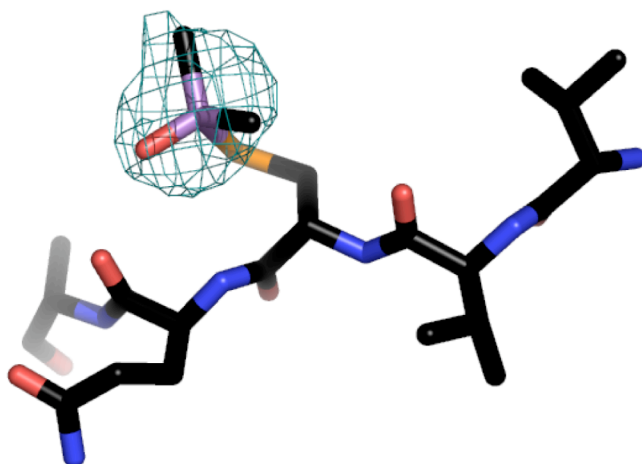

#### dimethylarsinoyl-Cys168

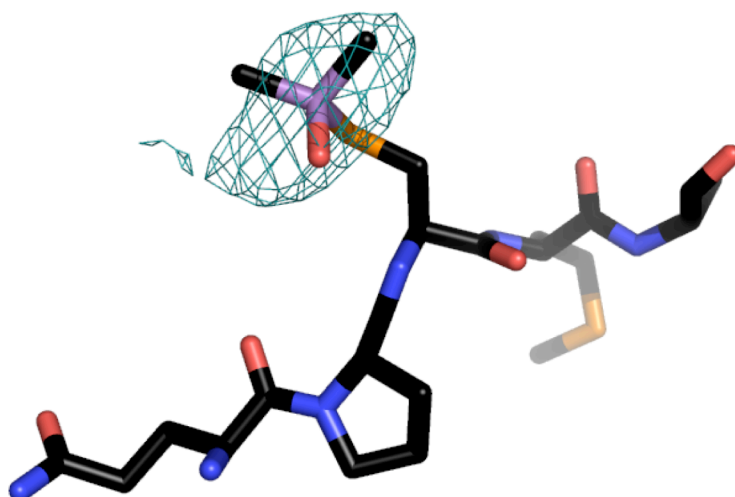

Supplement: mmi0061-1457-FigS1.pdf [file mmi0061-1457-FigS1.pdf]
